# Supplementary material
Source: Royal Society of Chemistry journal article supplement (doi:10.1039/d6ay00337k)
Supplement: d6ay00337k1.pdf [file d6ay00337k1.pdf]

**Supplementary Information**

**Waste-Derived Chlorogenic-Acid Ag Nanozyme for Nanomolar Dopamine Sensing in  
Pharmaceutical Formulations**

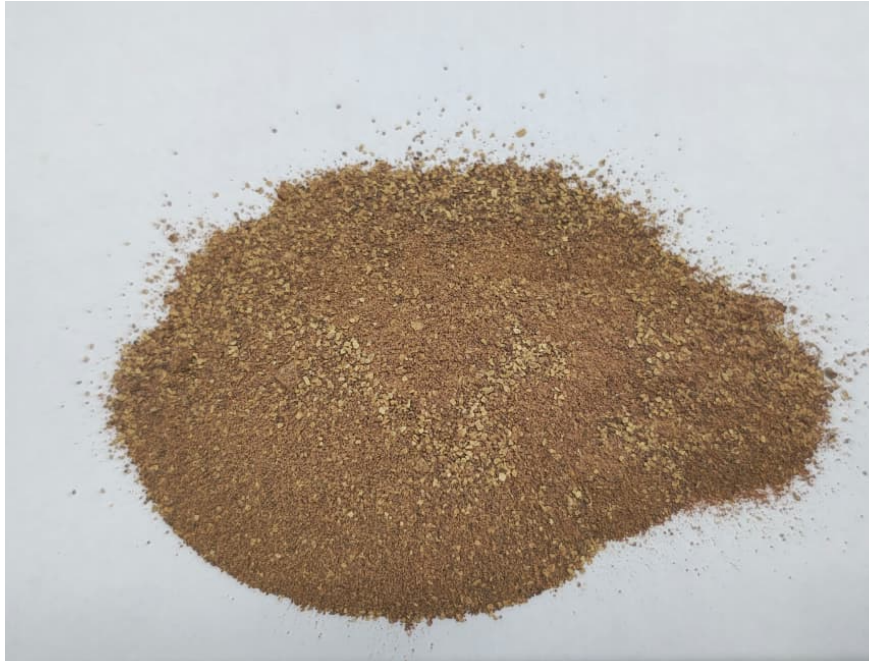

**Fig S1:** *Musa* *balbisiana*  
fermentation waste, dried and ground.

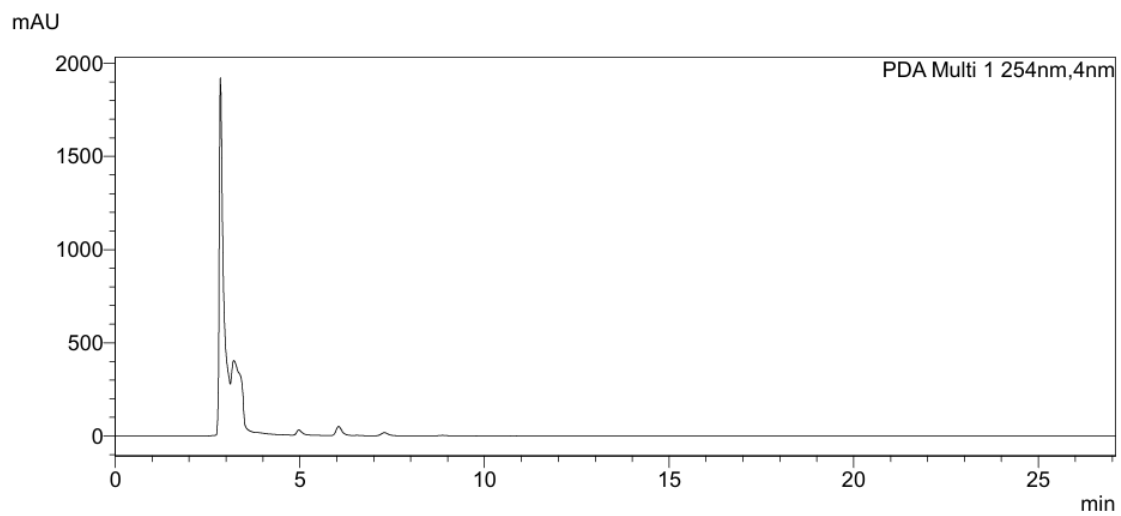

**Fig S2:** HPLC chromatogram of standard CGA showing peak at retention time 2.84 min in a binary solvent system composed of acetic acid and acetonitrile, with a ratio of A:B of 30 : 70.

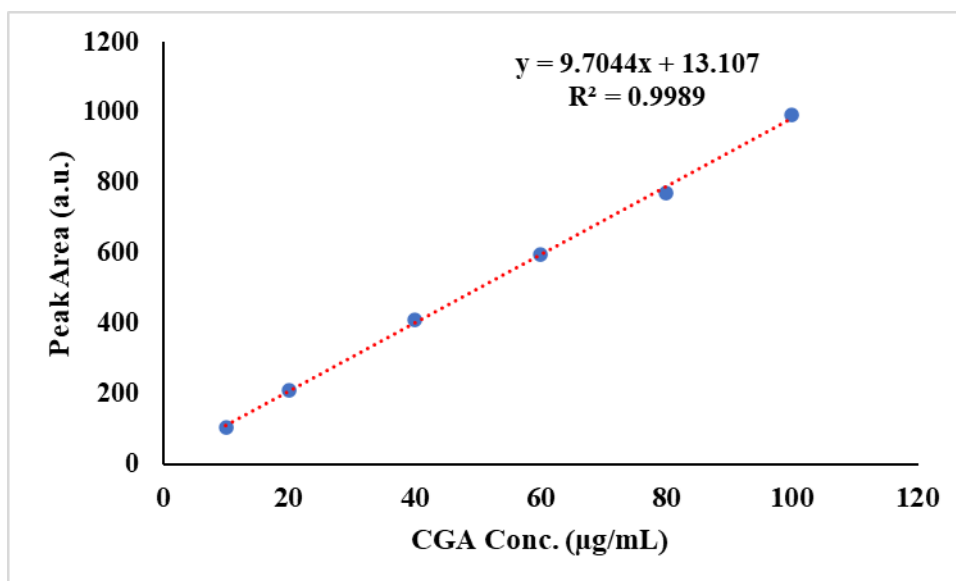

**Fig S3:** Calibration curve of chlorogenic acid standard obtained by plotting peak area versus concentration (10–100 µg/mL). The curve shows excellent linearity with regression equation  $y = 9.7044x + 13.107$  and correlation coefficient ( $R^2 = 0.9989$ ).

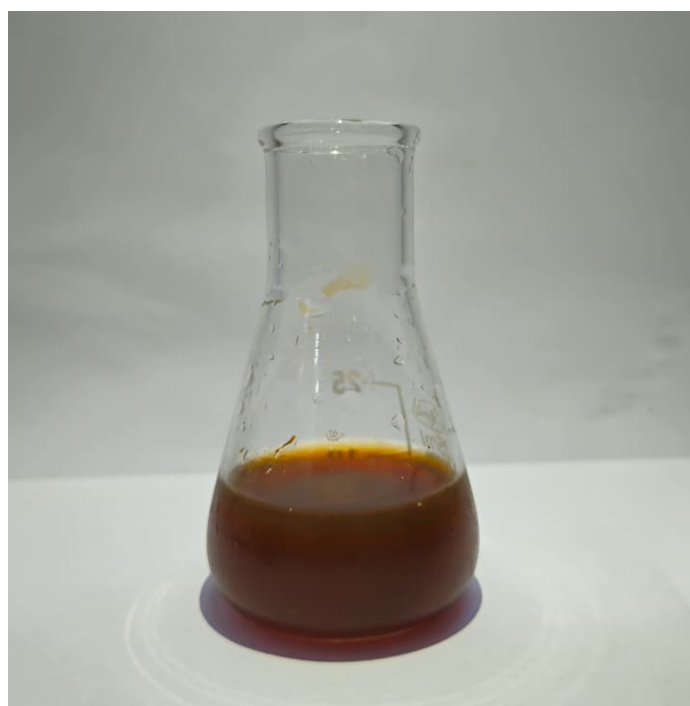

**Fig S4:** BK-AgNPs solution prepared using aqueous extract of *Musa balbisiana* fermentation waste.

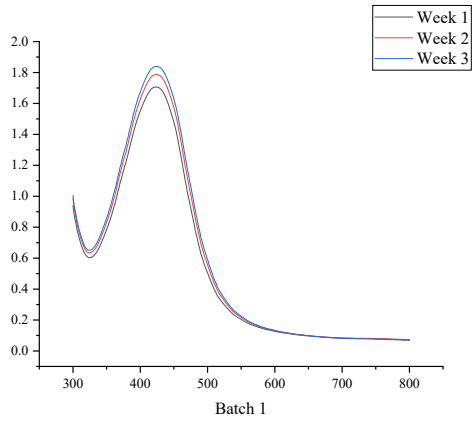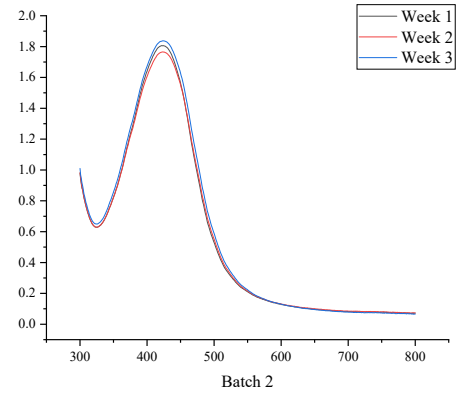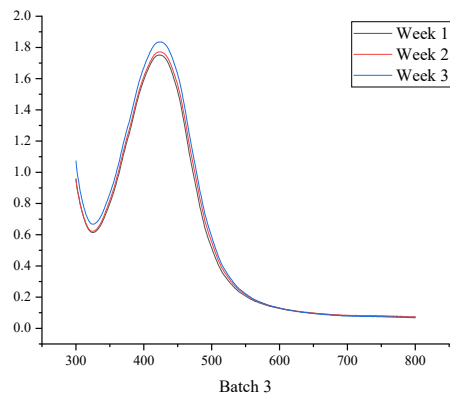

**Fig S5:** Shelf-life stability study of BK-AgNPs

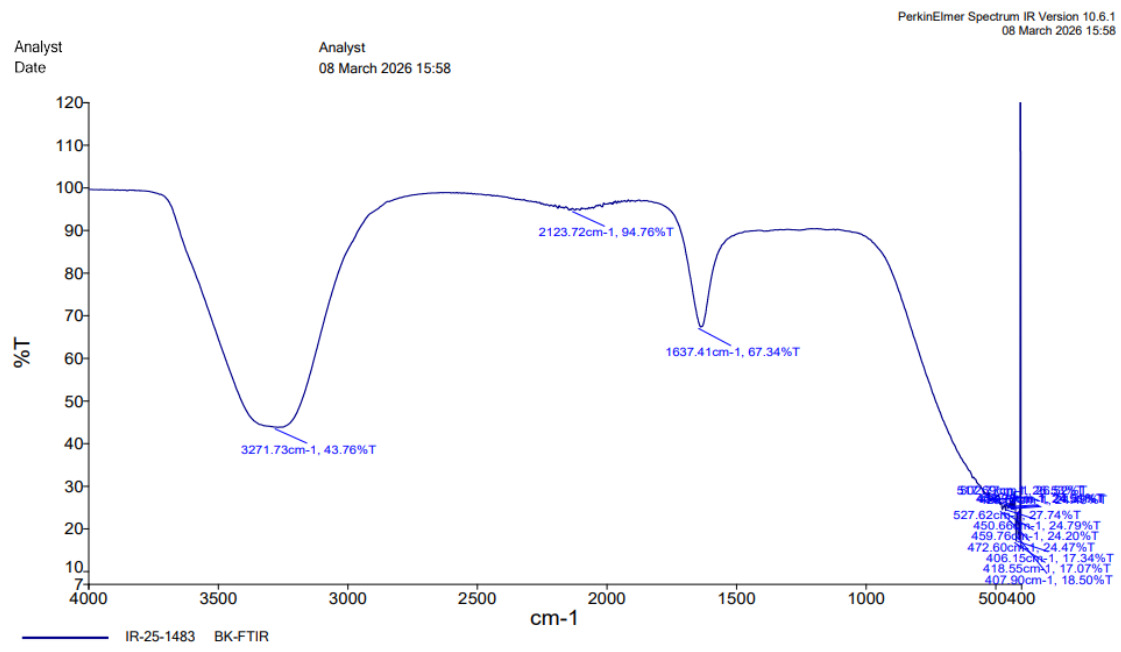

**Fig S6:** FTIR Spectrum of BK-AgNPs

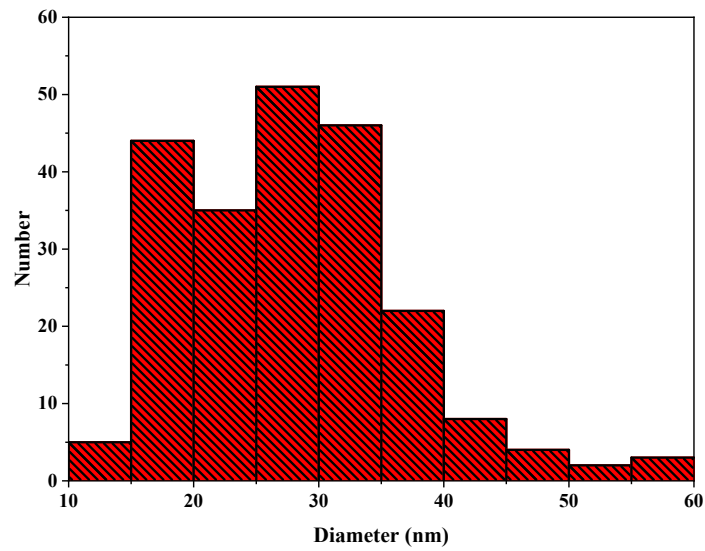

**Fig S7(a):** Particle histogram of nanoparticles obtained

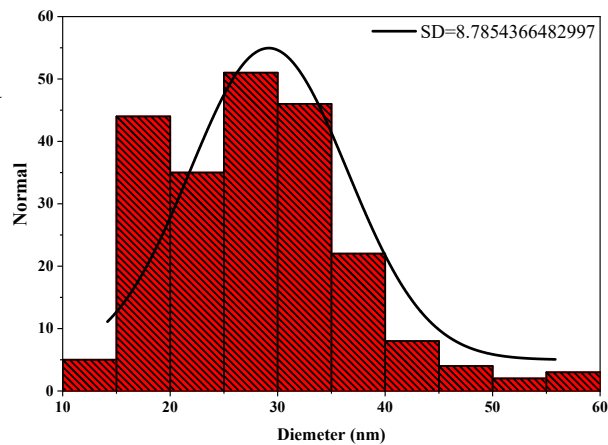

size distribution synthesized from TEM images.

**Fig S7(b):** TEM particle size distribution with normal fit.

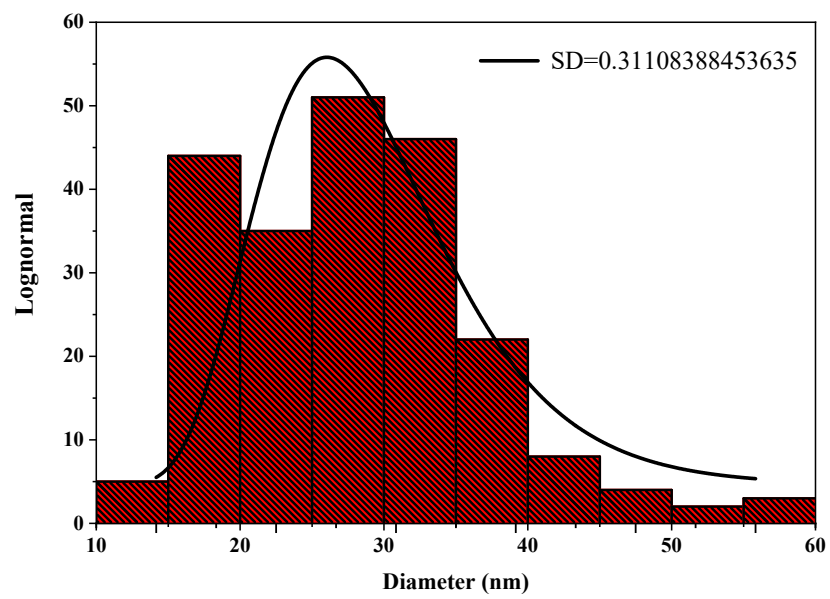

**Fig S7(c):** TEM particle size distribution with log-normal fit.

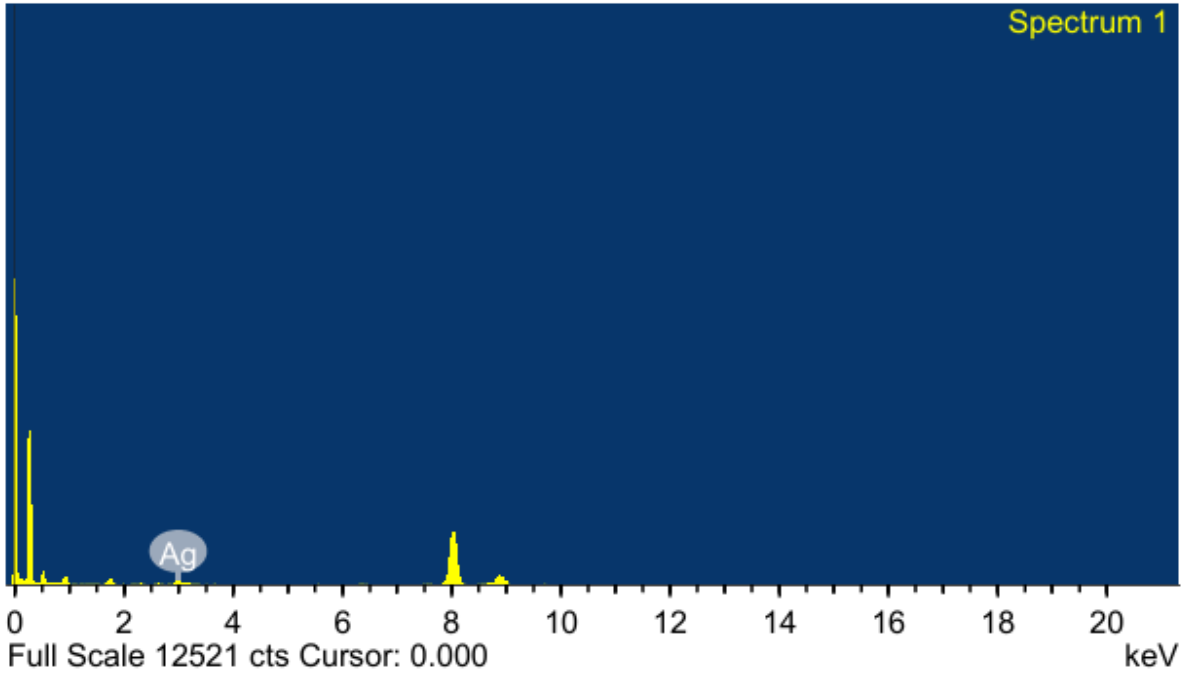

**Fig S8:** SEM-EDX spectrum of BK-AgNPs. Peaks possibly omitted at 0.933, 1.745, 2.320, 8.033, 8.896, 9.740 keV respectively.

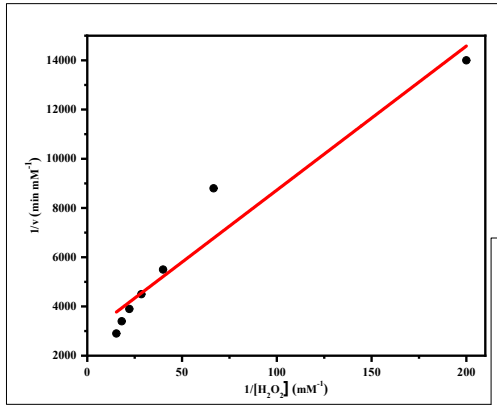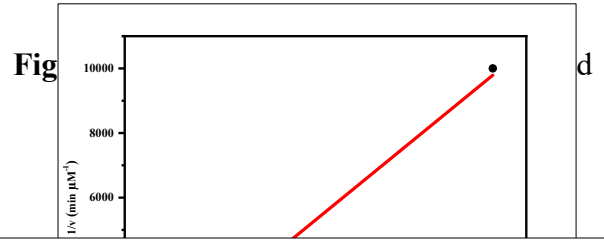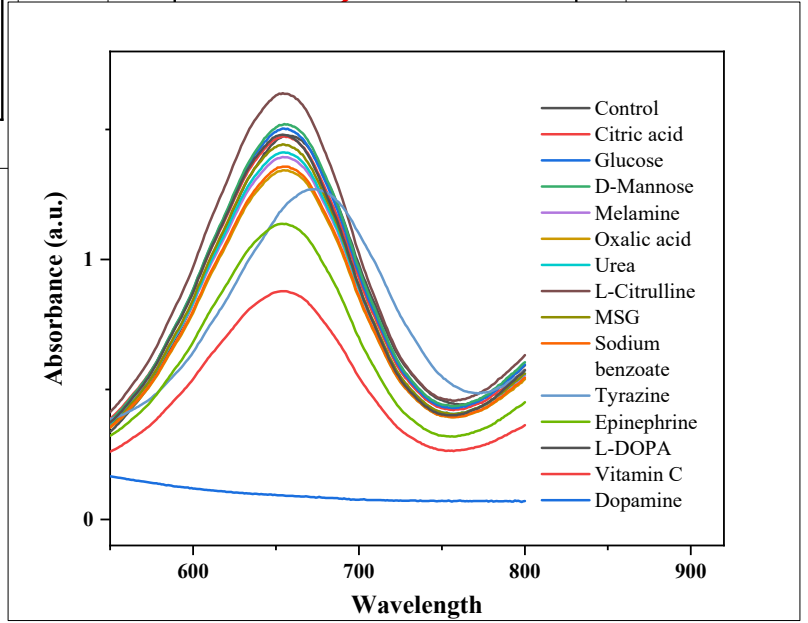

**Fig S10:** Selectivity of DA in presence of other interference.

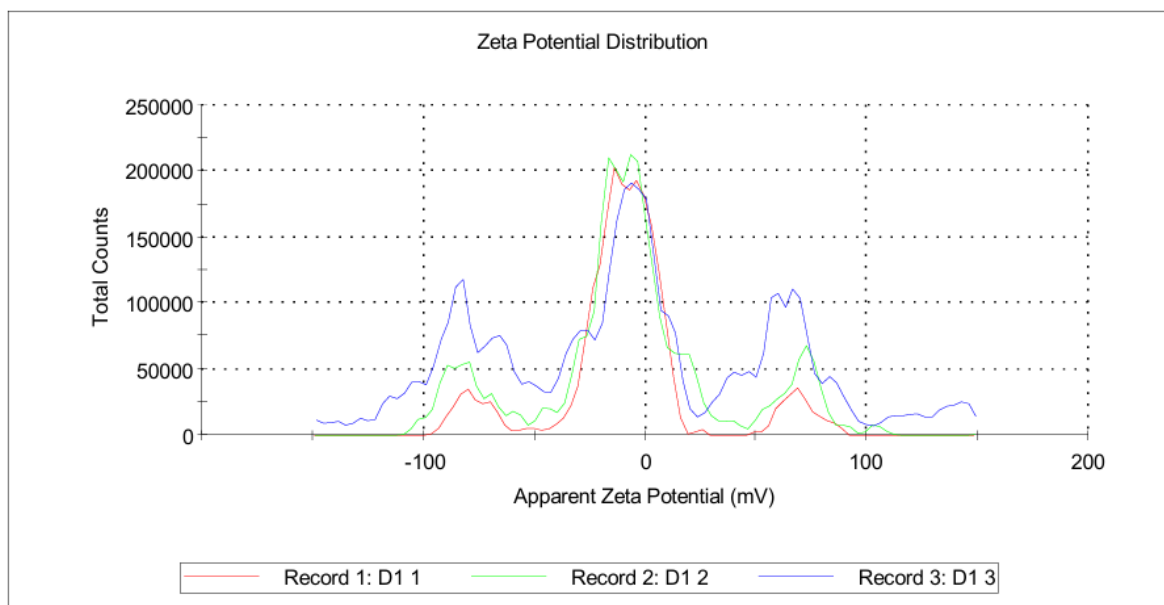

**Fig S11:** Zeta potential distribution of BK-AgNPs (Z1) at 25 °C.

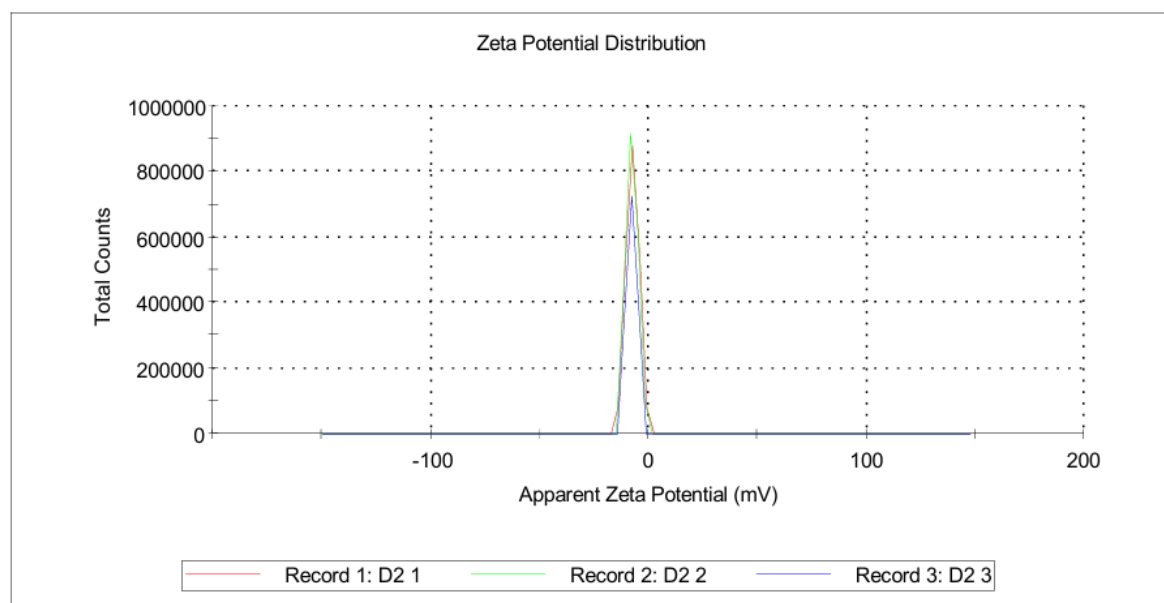

**Fig S12:** Zeta potential distribution of nanozyme solution (Z2) at 25 °C.

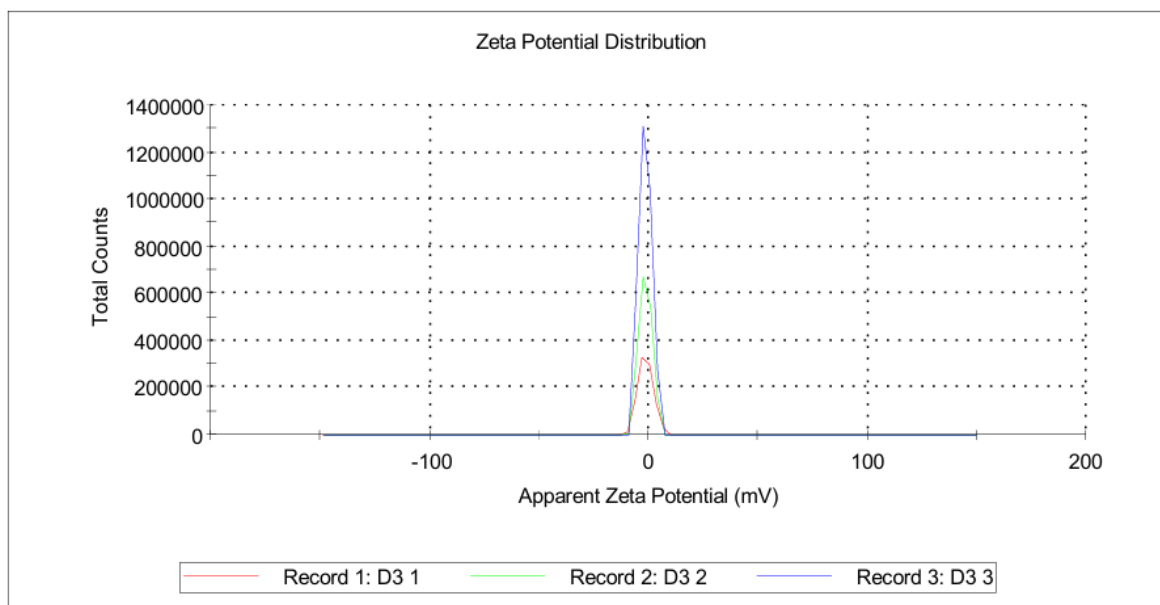

**Fig S13:** Zeta potential distribution of nanozyme + DA (Z3) at 25 °C.

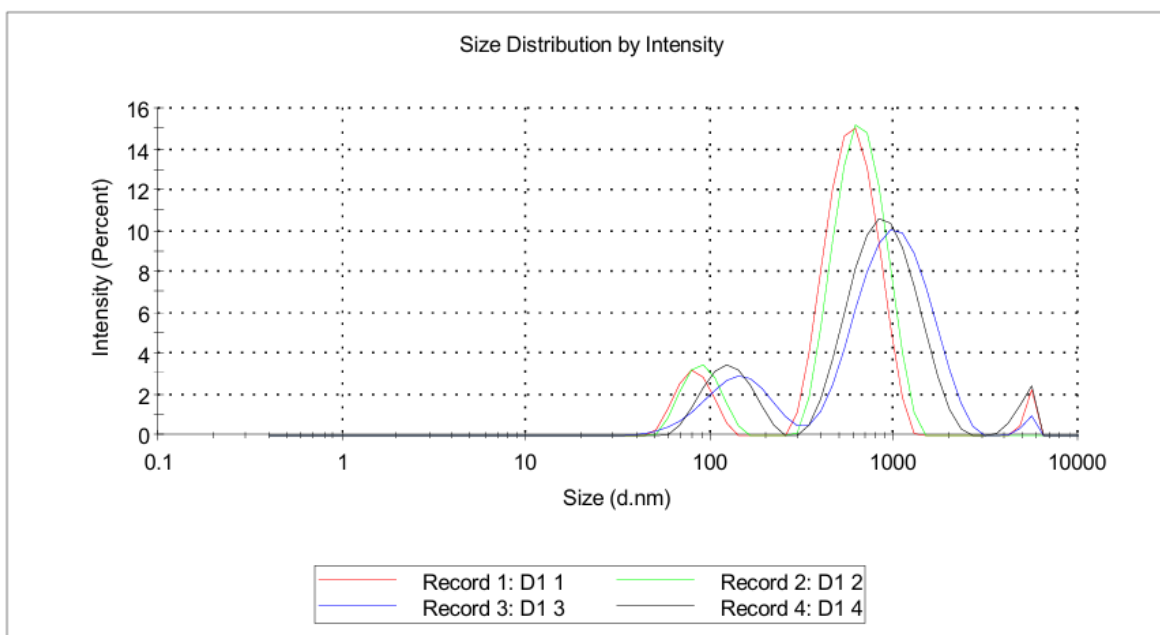

**Fig S14:** Hydrodynamic size distribution of BK-AgNPs (D1) at 25 °C.

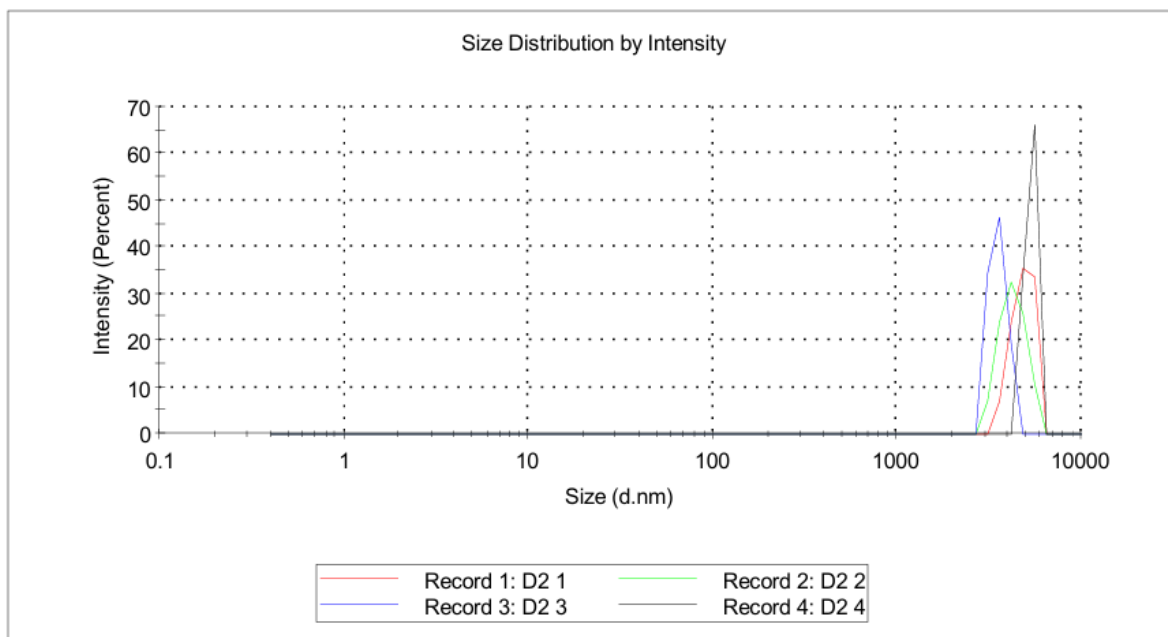

**Fig S15:** Hydrodynamic size distribution of nanozyme solution (D2) at 25 °C.

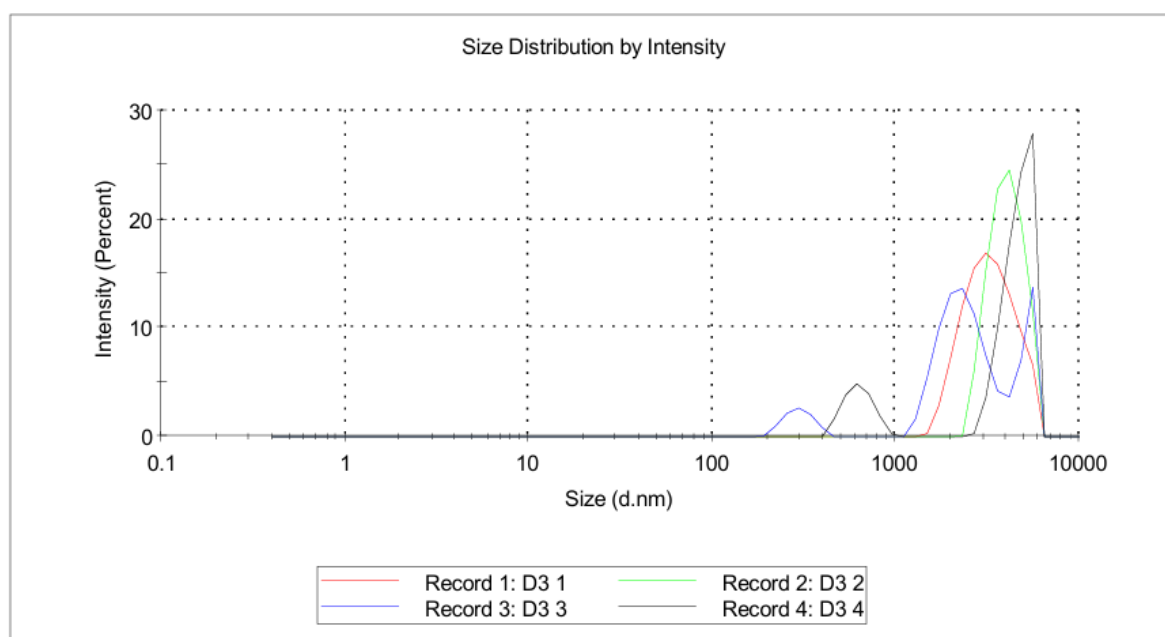

**Fig S16:** Hydrodynamic size distribution of nanozyme + DA (D3) at 25 °C.

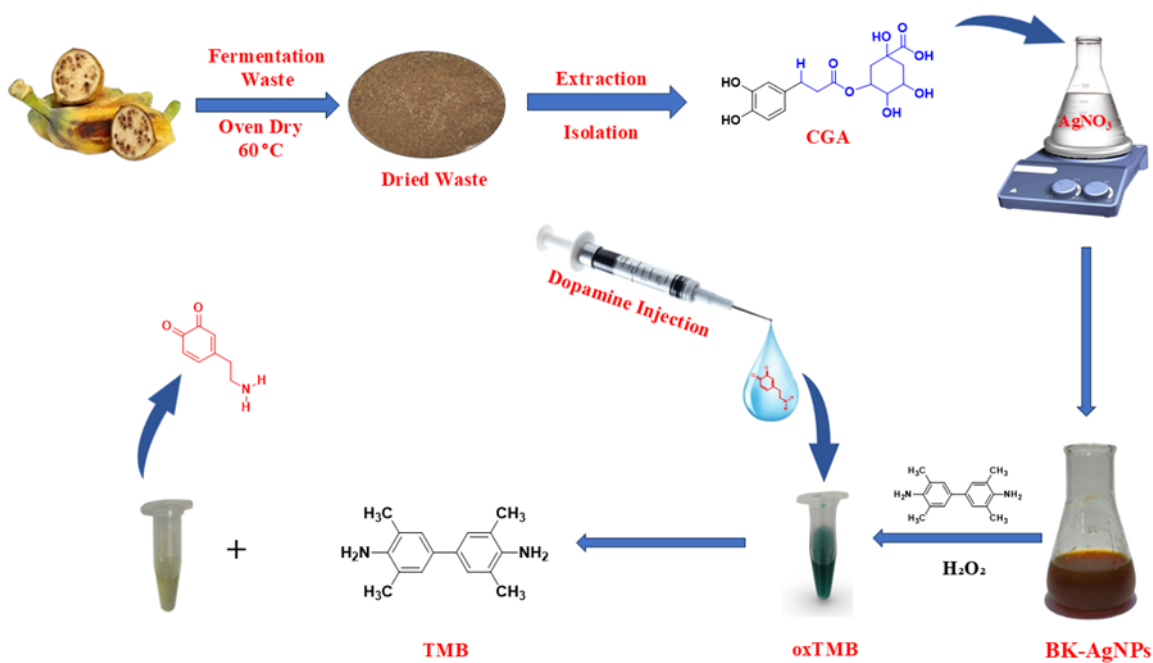

**Fig S17:** Schematic representation of the colorimetric sensing of pharmaceutical DA using BK-AgNPs.

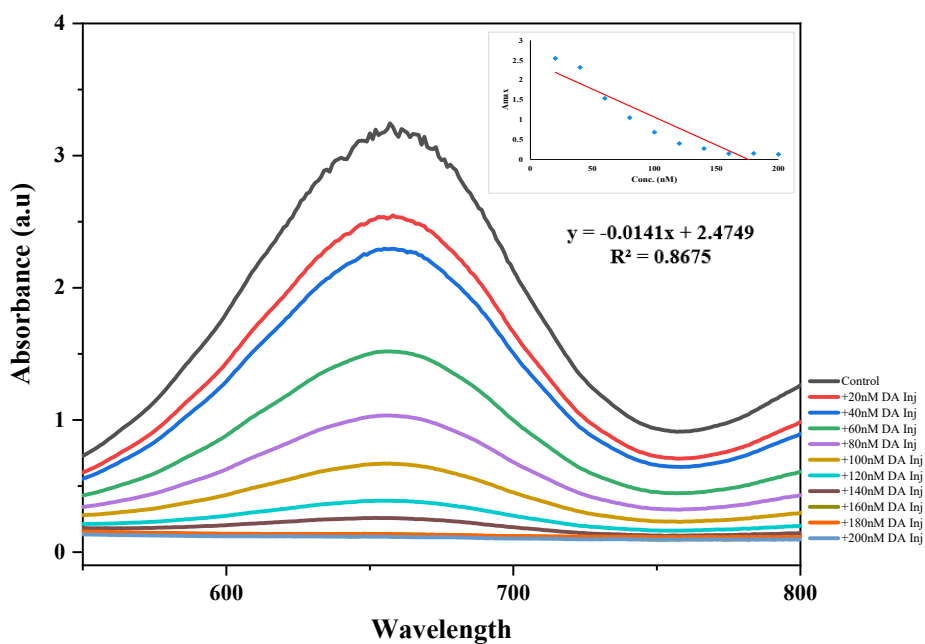

**Fig S18:** Colorimetric detection in series of concentrations of commercially available DA injection using peroxidase mimetic nanozyme of BK-AgNPs.

**Table S1:** Quantitative HPLC validation of the HPLC-isolated chlorogenic acid (CGA) fraction from *Musa balbisiana* wine waste (purity, recovery and precision parameters).

| <i>Parameter</i>                 | <i>Value</i> |
|----------------------------------|--------------|
| <i>Linearity (R<sup>2</sup>)</i> | 0.9989       |
| <i>Purity (%)</i>                | 92.3         |
| <i>Recovery (%)</i>              | 96-97        |
| <i>RSD (%)</i>                   | 2.1          |

**Table S2:** Fitted  $K_m$  and  $V_{max}$  values

| <b>Substrate</b>              | <b>Km</b> | <b>Vmax</b>           |
|-------------------------------|-----------|-----------------------|
| TMB                           | 3.25 mM   | $5.53 \times 10^{-4}$ |
| H <sub>2</sub> O <sub>2</sub> | 0.072 mM  | $6.84 \times 10^{-4}$ |

**Table S3:** Zeta potential, electrophoretic mobility and conductivity of BK-AgNPs and reaction mixtures.

| <i>Sample</i> | <i>Zeta Potential<br/>(mV)</i> | <i>Mean ± SD<br/>(mV)</i> | <i>Mobility<br/>(<math>\mu\text{m cm/V s}</math>)</i> | <i>Conductivity<br/>(mS/cm)</i> |
|---------------|--------------------------------|---------------------------|-------------------------------------------------------|---------------------------------|
| <b>Z1</b>     | -8.33, -7.44,<br>-8.25         | $-8.01 \pm 0.48$          | -0.6531 to<br>-0.6466                                 | 4.30–5.49                       |
| <b>Z2</b>     | -7.29, -7.47,<br>-7.59         | $-7.45 \pm 0.15$          | -0.5713 to<br>-0.5948                                 | 1.13–1.25                       |
| <b>Z3</b>     | -1.32, -1.38,<br>-1.41         | $-1.37 \pm 0.05$          | -0.1032 to<br>-0.1105                                 | 0.0096–0.0145                   |

**Table S4:** Hydrodynamic size and polydispersity of BK-AgNPs and reaction mixtures by DLS.

| <i>Sample</i>    | <i>Z-Average<br/>(d.nm)</i> | <i>Mean ± SD<br/>(d.nm)</i> | <i>PdI</i>  | <i>Major Peak<br/>(d.nm)</i> | <i>Major Peak<br/>(d.nm)</i> | <i>Minor Peaks<br/>(d.nm, %)</i>            |
|------------------|-----------------------------|-----------------------------|-------------|------------------------------|------------------------------|---------------------------------------------|
| <b><i>D1</i></b> | 437.6–504.3                 | 474.6 ± 29.6                | 0.526–0.779 | 611–1068                     | 76.9–<br>85.4                | ~80–145 nm<br>(12–20%),<br>>5 μm (1–<br>5%) |
| <b><i>D2</i></b> | 4460–6406                   | 5444 ± 846                  | 0.240–0.579 | 3521–5302                    | 100                          | -                                           |
| <b><i>D3</i></b> | 2913–3631                   | 3283 ± 309                  | 0.232–0.399 | 2390–4688                    | 68–100                       | ~0.63 μm<br>(16.3% in<br>one run)           |
